# Supplementary material for: Reversible color changes of metal(ii)-N1,N3-di(pyridin-4-yl)isophthalamide complexes via desolvation and solvation
Source: Royal Society of Chemistry journal article supplement (doi:10.1039/c0dt00326c), 2010-01-01
Supplement: c0dt00326c.pdf [file c0dt00326c.pdf]

## Supporting Information

### Reversible color changes of metal(II) - N<sup>1</sup>,N<sup>3</sup>-di(pyridin-4-yl)isophthalamide complexes via desolvation and salvation

Yun Gong,<sup>a,b</sup> Yuchao Zhou,<sup>b</sup> Jinghua Li,<sup>c</sup> Rong Cao,<sup>\*a</sup> JianBo Qin<sup>b</sup> and Jian Li<sup>b</sup>

<sup>a</sup> State Key Laboratory of Structural Chemistry, Fujian Institute of Research on the Structure of Matter, Chinese Academy of Sciences, Fuzhou, Fujian 350002, P. R. China. E-mail: E-mail: rcao@fjirsm.ac.cn, Fax: +86-591-83796710

<sup>b</sup> Department of Chemistry, College of Chemistry and Chemical Engineering, Chongqing University, Chongqing 400044, P. R. China

<sup>c</sup> Department of Pharmaceutical Chemistry, College of Chemistry and Chemical Engineering, Chongqing University, Chongqing 400044, P. R. China.

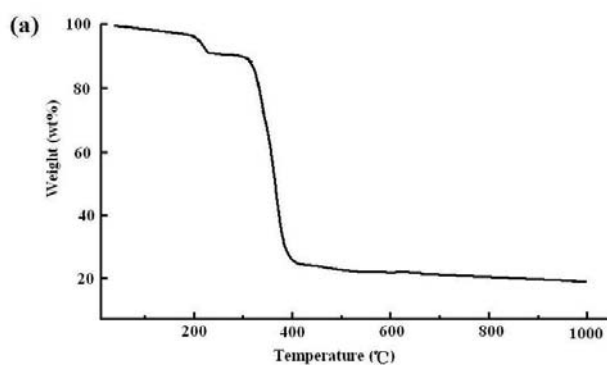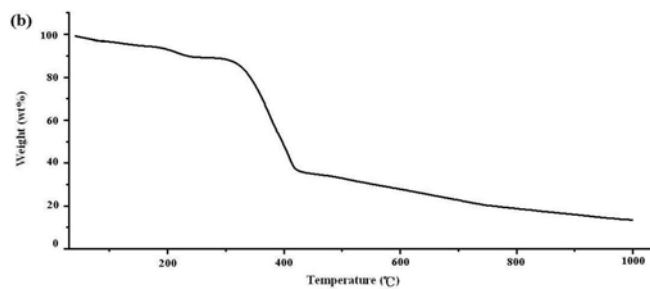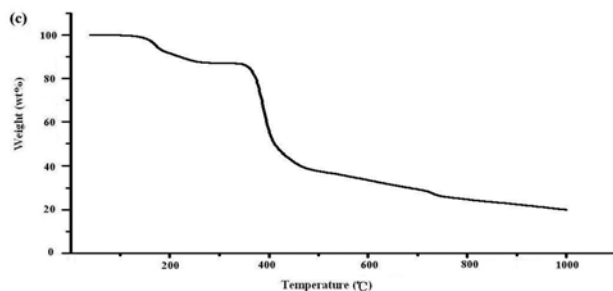

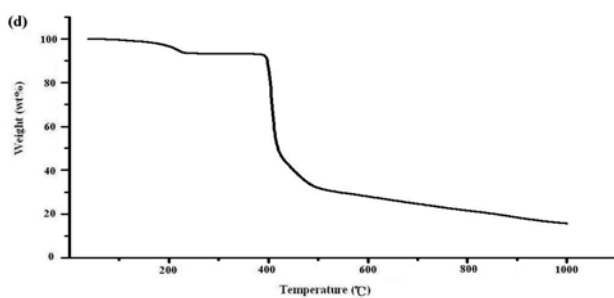

**Fig. S1** Thermogravimetric curves of complex **1** (a), complex **2** (b), complex **3** (c) and complex **4** (d).

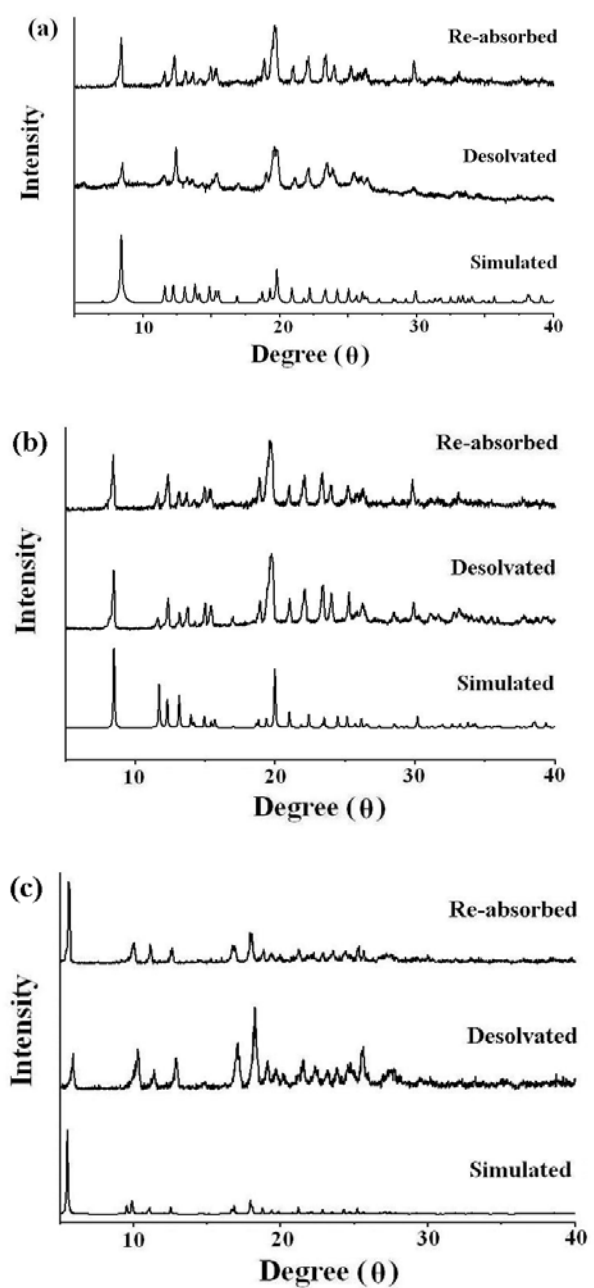

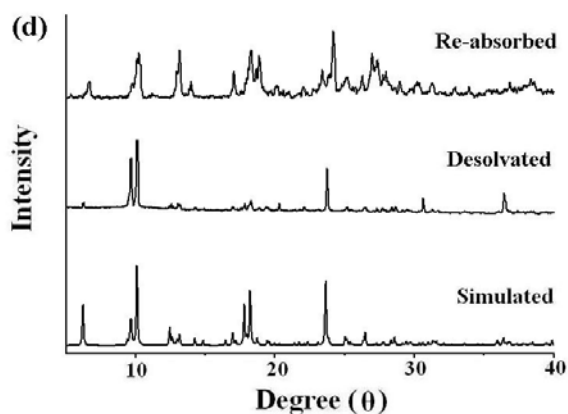

**Fig. S2** The PXR D patterns of complex 1 (a), complex 2 (b), complex 3 (c) and complex 4 (d), and the PXR D patterns of the simulated (below), desolvated (middle) and re-absorbed (above) samples.

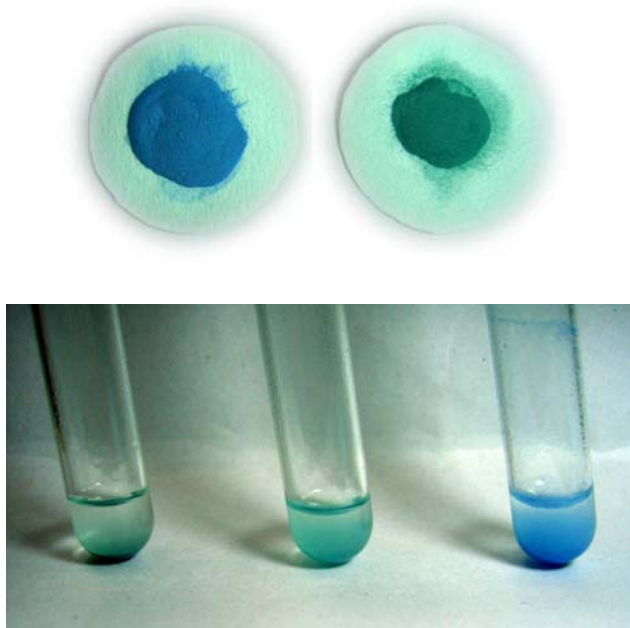

**Fig. S3** The hydrated (left, blue) and dehydrated (right, green) complex 1 (above), and the dehydrated complex 1 in acetone (left, green), DMF (middle, green) and water (right, blue) (below).

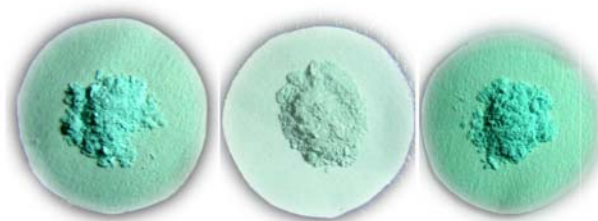

**Fig. S4** The hydrated (left, green), dehydrated (middle, offwhite) and re-hydrated (right, green) complex **2**.

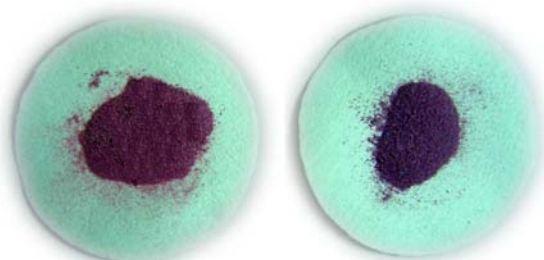

**Fig. S5** The solvated (left, red) and desolvated (right, purple) of complex **3**.
